# Supplementary material
Source: PubMed Central journal article supplement (PMC3351312)
Supplement: supp_M111.337212_jbc.M111.337212-1.pdf [file supp_M111.337212_jbc.M111.337212-1.pdf]

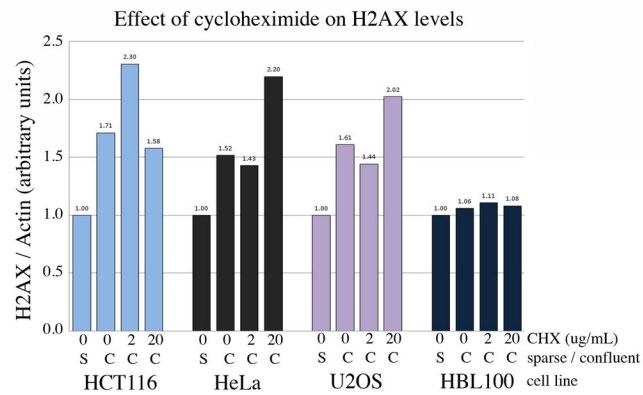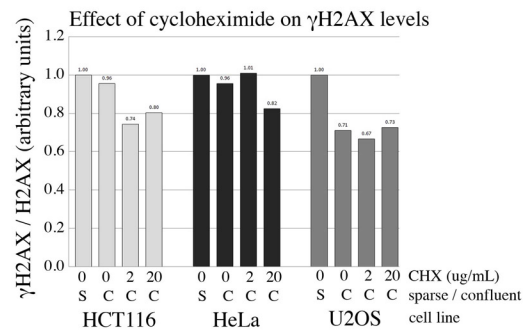

Supplementary Figure 1. Densitometric analysis was performed using the Image J software. H2AX and  $\gamma$ H2AX levels were normalized to Actin and H2AX levels, respectively.
