# Supplementary material
Source: PubMed Central journal article supplement (PMC3351312)
Supplement: supp_M111.337212_jbc.M111.337212-3.pdf [file supp_M111.337212_jbc.M111.337212-3.pdf]

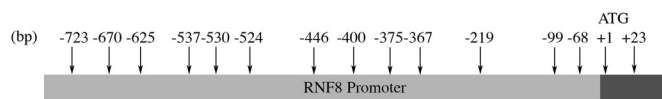

-723: CAAAG  
 -670: CTTTT  
 -625: CTTTT  
 -537: CTGTG  
 -530: CTTTG  
 -524: CTTTG  
 -446: AACAG  
 -400: AAAAG  
 -375: CTTTT  
 -367: AAAAG  
 -219: CTTTG  
 -99: CTGTT  
 -68: CACAG  
 +23: CACAG

LEF-1 consensus: A(T/A)TCAA(A/T)GG

Supplementary Figure 3.  
 Possible LEF-1 binding sites on the human Rnf8 promoter as predicted by the TRANSFAC program.
